# Supplementary material for: RNA N6-methyladenosine reader IGF2BP3 promotes acute myeloid leukemia progression by controlling stabilization of EPOR mRNA
Source: PeerJ. 2023 Aug 30;11:e15706. doi: 10.7717/peerj.15706 (PMC10474828; doi:10.7717/peerj.15706)
Supplement: Supplemental Information 2 [file peerj-11-15706-s002.xls]

## Sheet: Fig5B_PCR
1.Amplification curve
GAPDH							IGF2BP3
2.Data
Well	Fluor	Target	Content	Sample	Cq			Well	Fluor	Target	Content	Sample	Melt Temp
C03	SYBR	IGF2BP3	Unkn-1	NC	27.9507			C03	SYBR	IGF2BP3	Unkn-1	NC	81.5
C04	SYBR	IGF2BP3	Unkn-1	NC	27.8459			C04	SYBR	IGF2BP3	Unkn-1	NC	81.5
C05	SYBR	IGF2BP3	Unkn-1	NC	28.0547			C05	SYBR	IGF2BP3	Unkn-1	NC	81.5
C06	SYBR	GAPDH	Unkn-5	NC	17.4944			C06	SYBR	GAPDH	Unkn-5	NC	85.5
C07	SYBR	GAPDH	Unkn-5	NC	17.4632			C07	SYBR	GAPDH	Unkn-5	NC	85.5
C08	SYBR	GAPDH	Unkn-5	NC	17.3756			C08	SYBR	GAPDH	Unkn-5	NC	85.5
D03	SYBR	IGF2BP3	Unkn-2	SH-1	28.9766			D03	SYBR	IGF2BP3	Unkn-2	SH-1	81
D04	SYBR	IGF2BP3	Unkn-2	SH-1	28.9853			D04	SYBR	IGF2BP3	Unkn-2	SH-1	81.5
D05	SYBR	IGF2BP3	Unkn-2	SH-1	28.9555			D05	SYBR	IGF2BP3	Unkn-2	SH-1	81.5
D06	SYBR	GAPDH	Unkn-6	SH-1	16.7586			D06	SYBR	GAPDH	Unkn-6	SH-1	85.5
D07	SYBR	GAPDH	Unkn-6	SH-1	16.9724			D07	SYBR	GAPDH	Unkn-6	SH-1	85.5
D08	SYBR	GAPDH	Unkn-6	SH-1	16.861			D08	SYBR	GAPDH	Unkn-6	SH-1	85.5
E03	SYBR	IGF2BP3	Unkn-3	SH-2	29.2441			E03	SYBR	IGF2BP3	Unkn-3	SH-2	81.5
E04	SYBR	IGF2BP3	Unkn-3	SH-2	29.0855			E04	SYBR	IGF2BP3	Unkn-3	SH-2	81.5
E05	SYBR	IGF2BP3	Unkn-3	SH-2	28.9821			E05	SYBR	IGF2BP3	Unkn-3	SH-2	81.5
E06	SYBR	GAPDH	Unkn-7	SH-2	16.4074			E06	SYBR	GAPDH	Unkn-7	SH-2	85.5
E07	SYBR	GAPDH	Unkn-7	SH-2	16.3461			E07	SYBR	GAPDH	Unkn-7	SH-2	85.5
E08	SYBR	GAPDH	Unkn-7	SH-2	16.2934			E08	SYBR	GAPDH	Unkn-7	SH-2	85.5
F03	SYBR	IGF2BP3	Unkn-4	SH-3	29.0055			F03	SYBR	IGF2BP3	Unkn-4	SH-3	81.5
F04	SYBR	IGF2BP3	Unkn-4	SH-3	29.2822			F04	SYBR	IGF2BP3	Unkn-4	SH-3	81.5
F05	SYBR	IGF2BP3	Unkn-4	SH-3	29.045			F05	SYBR	IGF2BP3	Unkn-4	SH-3	81.5
F06	SYBR	GAPDH	Unkn-8	SH-3	16.9747			F06	SYBR	GAPDH	Unkn-8	SH-3	85.5
F07	SYBR	GAPDH	Unkn-8	SH-3	16.9477			F07	SYBR	GAPDH	Unkn-8	SH-3	85.5
F08	SYBR	GAPDH	Unkn-8	SH-3	16.8914			F08	SYBR	GAPDH	Unkn-8	SH-3	85.5
3.Data analysis
Target Gene	group		Data analysis
			GAPDH	Gene	∆Ct	Average ∆Ct	∆∆Ct	2^-△△Ct	STDEV	P Value（VS NC）
IGF2BP3	NC		17.4944	27.9507	10.4562	10.506	0	1	0.154358
			17.4632	27.8459	10.3827
			17.3756	28.0547	10.6791
	SH-1		16.7586	28.9766	12.218	12.1085	1.60244	0.329319	0.103279	#VALUE!
			16.9724	28.9853	12.0129
			16.861	28.9555	12.0946
	SH-2		16.4074	29.2441	12.8367	12.7549	2.24887	0.210388	0.0752294	#VALUE!
			16.3461	29.0855	12.7394
			16.2934	28.9821	12.6887
	SH-3		16.9747	29.0055	12.0308	12.173	1.66692	0.314925	0.152767	#VALUE!
			16.9477	29.2822	12.3345
			16.8914	29.045	12.1535
4.Dissolution curve
GAPDH
IGF2BP3
3. Primer information
Internal reference gene	Upstream primer sequence	Downstream primer sequence
GAPDH	AGAAGGCTGGGGCTCATTTG	AGGGGCCATCCACAGTCTTC
Target gene	Upstream primer sequence	Downstream primer sequence
IGF2BP3	AGGCTCAGTTCAAGGCTCAG	TGGTCATTCTCATCAGGTGTCT

## Sheet: Fig5C_PCR
1.Amplification curve
GAPDH							IGF2BP3
2.Data
Well	Fluor	Target	Content	Sample	Cq			Well	Fluor	Target	Content	Sample	Melt Temp
E04	SYBR	IGF2BP3	Unkn-05	NC	25.0395			E04	SYBR	IGF2BP3	Unkn-05	NC	81.5
E05	SYBR	IGF2BP3	Unkn-05	NC	25.3578			E05	SYBR	IGF2BP3	Unkn-05	NC	82
E06	SYBR	IGF2BP3	Unkn-05	NC	25.1118			E06	SYBR	IGF2BP3	Unkn-05	NC	81.5
E07	SYBR	GAPDH	Unkn-13	NC	17.7963			E07	SYBR	GAPDH	Unkn-13	NC	85.5
E08	SYBR	GAPDH	Unkn-13	NC	17.9304			E08	SYBR	GAPDH	Unkn-13	NC	86
E09	SYBR	GAPDH	Unkn-13	NC	17.9404			E09	SYBR	GAPDH	Unkn-13	NC	86
F04	SYBR	IGF2BP3	Unkn-06	SH-1	26.2211			F04	SYBR	IGF2BP3	Unkn-06	SH-1	81.5
F05	SYBR	IGF2BP3	Unkn-06	SH-1	26.5016			F05	SYBR	IGF2BP3	Unkn-06	SH-1	81.5
F06	SYBR	IGF2BP3	Unkn-06	SH-1	26.4385			F06	SYBR	IGF2BP3	Unkn-06	SH-1	81.5
F07	SYBR	GAPDH	Unkn-14	SH-1	17.0898			F07	SYBR	GAPDH	Unkn-14	SH-1	86
F08	SYBR	GAPDH	Unkn-14	SH-1	17.2687			F08	SYBR	GAPDH	Unkn-14	SH-1	86
F09	SYBR	GAPDH	Unkn-14	SH-1	17.1351			F09	SYBR	GAPDH	Unkn-14	SH-1	86
G04	SYBR	IGF2BP3	Unkn-07	SH-2	26.1207			G04	SYBR	IGF2BP3	Unkn-07	SH-2	81.5
G05	SYBR	IGF2BP3	Unkn-07	SH-2	26.1461			G05	SYBR	IGF2BP3	Unkn-07	SH-2	81.5
G06	SYBR	IGF2BP3	Unkn-07	SH-2	26.3636			G06	SYBR	IGF2BP3	Unkn-07	SH-2	81.5
G07	SYBR	GAPDH	Unkn-15	SH-2	16.7246			G07	SYBR	GAPDH	Unkn-15	SH-2	86
G08	SYBR	GAPDH	Unkn-15	SH-2	16.6202			G08	SYBR	GAPDH	Unkn-15	SH-2	86
G09	SYBR	GAPDH	Unkn-15	SH-2	16.6582			G09	SYBR	GAPDH	Unkn-15	SH-2	86
H04	SYBR	IGF2BP3	Unkn-08	SH-3	27.1531			H04	SYBR	IGF2BP3	Unkn-08	SH-3	81.5
H05	SYBR	IGF2BP3	Unkn-08	SH-3	27.1055			H05	SYBR	IGF2BP3	Unkn-08	SH-3	81.5
H06	SYBR	IGF2BP3	Unkn-08	SH-3	26.9362			H06	SYBR	IGF2BP3	Unkn-08	SH-3	81.5
H07	SYBR	GAPDH	Unkn-16	SH-3	17.0835			H07	SYBR	GAPDH	Unkn-16	SH-3	86
H08	SYBR	GAPDH	Unkn-16	SH-3	17.1092			H08	SYBR	GAPDH	Unkn-16	SH-3	86
H09	SYBR	GAPDH	Unkn-16	SH-3	17.2402			H09	SYBR	GAPDH	Unkn-16	SH-3	86.5
3.Data analysis
Target Gene	group		Data analysis
			GAPDH	IGF2BP3	∆Ct	Average ∆Ct	∆∆Ct	2^-△△Ct	STDEV	P Value（VS NC）
IGF2BP3	NC		17.7963	25.0395	7.24325	7.28067	0	1	0.132046
			17.9304	25.3578	7.42739
			17.9404	25.1118	7.17137
	SH-1		17.0898	26.2211	9.13129	9.2225	1.94183	0.260287	0.0864984	#VALUE!
			17.2687	26.5016	9.23284
			17.1351	26.4385	9.30336
	SH-2		16.7246	26.1207	9.39608	9.54247	2.2618	0.208511	0.155323	#VALUE!
			16.6202	26.1461	9.52593
			16.6582	26.3636	9.7054
	SH-3		17.0835	27.1531	10.0696	9.92061	2.63994	0.160435	0.197966	#VALUE!
			17.1092	27.1055	9.99626
			17.2402	26.9362	9.69597
4.Dissolution curve
GAPDH
IGF2BP3

## Sheet: Fig5D_CCK8
CCK8 OD450 and OD450/fold
	Time(h)	KG1A-NC			KG1A-SH1			KG1A-SH2			Blank
KG-1a	24h	0.377	0.386	0.387	0.377	0.375	0.374	0.361	0.352	0.362	0.156	0.146	0.145
	48h	0.562	0.544	0.576	0.504	0.488	0.513	0.483	0.492	0.484	0.132	0.136	0.145
	72h	0.794	0.777	0.787	0.634	0.647	0.649	0.648	0.619	0.607	0.152	0.153	0.129
	96h	0.962	0.944	0.956	0.712	0.733	0.739	0.708	0.698	0.711	0.164	0.124	0.131
	Time(h)	KG1A-NC			KG1A-SH1			KG1A-SH2
KG-1a	24h	0.221	0.24	0.242	0.221	0.229	0.229	0.205	0.206	0.217
	48h	0.43	0.408	0.431	0.372	0.352	0.368	0.351	0.356	0.339
	72h	0.642	0.624	0.658	0.482	0.494	0.52	0.496	0.466	0.478
	96h	0.798	0.82	0.825	0.548	0.609	0.608	0.544	0.574	0.58
	Time(h)	KG1A-NC			KG1A-SH1			KG1A-SH2
KG-1a	24h	1	1.08597	1.09502	1	1.0362	1.0362	0.927602	0.932127	0.9819	0.94721
	48h	1.9457	1.84615	1.95023	1.68326	1.59276	1.66516	1.58824	1.61086	1.53394
	72h	2.90498	2.82353	2.97738	2.181	2.23529	2.35294	2.24434	2.1086	2.1629
	96h	3.61086	3.71041	3.73303	2.47964	2.75566	2.75113	2.46154	2.59729	2.62443
CCK8 OD450 and OD450/fold Mean and standard deviation
table1	Time(h)	KG1A-NC	KG1A-SH1	KG1A-SH2
KG-1a	24h	0.234333	0.226333	0.209333
	48h	0.423	0.364	0.348667
	72h	0.641333	0.498667	0.48
	96h	0.814333	0.588333	0.566
KG-1a	24h	0.0115902	0.0046188	0.0138564
	48h	0.013	0.010583	0.00953939
	72h	0.0170098	0.0194251	0.0144684
	96h	0.0143643	0.0349333	0.0372424
table2	Time(h)	KG1A-NC	KG1A-SH1	KG1A-SH2
KG-1a	24h	1.06033	1.02413	0.94721
	48h	1.91403	1.64706	1.57768
	72h	2.90196	2.25641	2.17195
	96h	3.68477	2.66214	2.56109
KG-1a	24h	0.0524445	0.0208996	0.0301282
	48h	0.0588235	0.0478869	0.0395335
	72h	0.0769674	0.0878962	0.0683243
	96h	0.0649969	0.158069	0.0872729
table3	Time(h)	KG1A-SH1	KG1A-SH2
P value (VS CTR)	24h	0.329005	0.0316888
	48h	0.00366237	0.00119401
	72h	0.000665991	0.000252122
	96h	0.000489364	5.74286e-05
	* p < 0.05, * * p < 0.01, * * * p < 0.001

## Sheet: Fig5E_CCK8
CCK8 OD450 and OD450/fold
	Time(h)	THP-1-NC			THP-1-SH1			THP-1-SH2			Blank
THP-1	24h	0.386	0.397	0.387	0.399	0.378	0.386	0.368	0.376	0.391	0.123	0.142	0.122
	48h	0.646	0.656	0.664	0.536	0.542	0.536	0.504	0.532	0.524	0.112	0.153	0.133
	72h	0.789	0.799	0.784	0.643	0.653	0.651	0.653	0.611	0.656	0.132	0.123	0.132
	96h	0.897	0.886	0.879	0.712	0.734	0.723	0.704	0.699	0.702	0.131	0.126	0.106
	Time(h)	THP-1-NC			THP-1-SH1			THP-1-SH2
THP-1	24h	0.263	0.255	0.265	0.276	0.236	0.264	0.245	0.234	0.269
	48h	0.534	0.503	0.531	0.424	0.389	0.403	0.392	0.379	0.391
	72h	0.657	0.676	0.652	0.511	0.53	0.519	0.521	0.488	0.524
	96h	0.766	0.76	0.773	0.581	0.608	0.617	0.573	0.573	0.596
	Time(h)	THP-1-NC			THP-1-SH1			THP-1-SH2
THP-1	24h	1	0.969582	1.0076	1.04943	0.897338	1.0038	0.931559	0.889734	1.02281
	48h	2.03042	1.91255	2.01901	1.61217	1.47909	1.53232	1.49049	1.44106	1.48669
	72h	2.4981	2.57034	2.47909	1.94297	2.01521	1.97338	1.98099	1.85551	1.9924
	96h	2.91255	2.88973	2.93916	2.20913	2.31179	2.34601	2.17871	2.17871	2.26616
CCK8 OD450 and OD450/fold Mean and standard deviation
table1	Time(h)	THP-1-NC	THP-1-SH1	THP-1-SH2
THP-1	24h	0.261	0.258667	0.249333
	48h	0.522667	0.405333	0.387333
	72h	0.661667	0.52	0.511			1	0.969582	1.0076	0.992395
	96h	0.766333	0.602	0.580667
THP-1	24h	0.0052915	0.0205264	0.0142945
	48h	0.0170978	0.0176163	0.00737111
	72h	0.0126623	0.00953939	0.00585947
	96h	0.00650641	0.018735	0.0232451
table2	Time(h)	THP-1-NC	THP-1-SH1	THP-1-SH2
THP-1	24h	0.992395	0.983523	0.948035
	48h	1.98733	1.54119	1.47275
	72h	2.51584	1.97719	1.94297
	96h	2.91381	2.28897	2.20786
THP-1	24h	0.0201198	0.0780472	0.0680527
	48h	0.0650105	0.0669821	0.0275064
	72h	0.0481456	0.0362715	0.0759505
	96h	0.0247392	0.0712357	0.0504907
table3	Time(h)	THP-1-SH1	THP-1-SH2
P value (VS CTR)	24h	0.85808	0.339845
	48h	0.00116217	0.000226538
	72h	0.000101706	0.000383502
	96h	0.000136962	2.64509e-05

## Sheet: Fig5I and 5J
1.Amplification curve
2.Data
Well	Fluor	Target	Content	Sample	Cq			Well	Fluor	Target	Content	Sample	Melt Temp
A02	SYBR	CD14	Unkn-01	NC	26.9512			A02	SYBR	CD14	Unkn-01	NC	83
A03	SYBR	CD14	Unkn-01	NC	27.1263			A03	SYBR	CD14	Unkn-01	NC	83
A04	SYBR	CD14	Unkn-01	NC	27.196			A04	SYBR	CD14	Unkn-01	NC	83
A05	SYBR	CD11b	Unkn-07	NC	27.5572			A05	SYBR	CD11b	Unkn-07	NC	82.5
A06	SYBR	CD11b	Unkn-07	NC	27.6347			A06	SYBR	CD11b	Unkn-07	NC	82.5
A07	SYBR	CD11b	Unkn-07	NC	27.4079			A07	SYBR	CD11b	Unkn-07	NC	82.5
A08	SYBR	GAPDH	Unkn-13	NC	18.6491			A08	SYBR	GAPDH	Unkn-13	NC	84
A09	SYBR	GAPDH	Unkn-13	NC	18.6193			A09	SYBR	GAPDH	Unkn-13	NC	84
A10	SYBR	GAPDH	Unkn-13	NC	18.6392			A10	SYBR	GAPDH	Unkn-13	NC	83.5
B02	SYBR	CD14	Unkn-02	SH-1	29.6552			B02	SYBR	CD14	Unkn-02	SH-1	83
B03	SYBR	CD14	Unkn-02	SH-1	29.8364			B03	SYBR	CD14	Unkn-02	SH-1	83
B04	SYBR	CD14	Unkn-02	SH-1	29.6358			B04	SYBR	CD14	Unkn-02	SH-1	83
B05	SYBR	CD11b	Unkn-08	SH-1	29.8097			B05	SYBR	CD11b	Unkn-08	SH-1	83
B06	SYBR	CD11b	Unkn-08	SH-1	29.7623			B06	SYBR	CD11b	Unkn-08	SH-1	82.5
B07	SYBR	CD11b	Unkn-08	SH-1	29.7293			B07	SYBR	CD11b	Unkn-08	SH-1	83
B08	SYBR	GAPDH	Unkn-14	SH-1	18.9234			B08	SYBR	GAPDH	Unkn-14	SH-1	83.5
B09	SYBR	GAPDH	Unkn-14	SH-1	18.7811			B09	SYBR	GAPDH	Unkn-14	SH-1	84
B10	SYBR	GAPDH	Unkn-14	SH-1	18.938			B10	SYBR	GAPDH	Unkn-14	SH-1	83.5
C02	SYBR	CD14	Unkn-03	SH-2	29.1663			C02	SYBR	CD14	Unkn-03	SH-2	83
C03	SYBR	CD14	Unkn-03	SH-2	29.0044			C03	SYBR	CD14	Unkn-03	SH-2	83
C04	SYBR	CD14	Unkn-03	SH-2	29.0015			C04	SYBR	CD14	Unkn-03	SH-2	83.5
C05	SYBR	CD11b	Unkn-09	SH-2	29.3863			C05	SYBR	CD11b	Unkn-09	SH-2	83
C06	SYBR	CD11b	Unkn-09	SH-2	29.2097			C06	SYBR	CD11b	Unkn-09	SH-2	83
C07	SYBR	CD11b	Unkn-09	SH-2	29.3803			C07	SYBR	CD11b	Unkn-09	SH-2	83
C08	SYBR	GAPDH	Unkn-15	SH-2	18.6673			C08	SYBR	GAPDH	Unkn-15	SH-2	84
C09	SYBR	GAPDH	Unkn-15	SH-2	18.6539			C09	SYBR	GAPDH	Unkn-15	SH-2	84
C10	SYBR	GAPDH	Unkn-15	SH-2	18.8245			C10	SYBR	GAPDH	Unkn-15	SH-2	83.5
D02	SYBR	CD14	Unkn-04	NC	27.4717			D02	SYBR	CD14	Unkn-04	NC	83
D03	SYBR	CD14	Unkn-04	NC	27.6857			D03	SYBR	CD14	Unkn-04	NC	83
D04	SYBR	CD14	Unkn-04	NC	27.6769			D04	SYBR	CD14	Unkn-04	NC	83
D05	SYBR	CD11b	Unkn-10	NC	26.6012			D05	SYBR	CD11b	Unkn-10	NC	82.5
D06	SYBR	CD11b	Unkn-10	NC	26.7072			D06	SYBR	CD11b	Unkn-10	NC	82.5
D07	SYBR	CD11b	Unkn-10	NC	26.6319			D07	SYBR	CD11b	Unkn-10	NC	82.5
D08	SYBR	GAPDH	Unkn-16	NC	19.2661			D08	SYBR	GAPDH	Unkn-16	NC	84
D09	SYBR	GAPDH	Unkn-16	NC	19.3848			D09	SYBR	GAPDH	Unkn-16	NC	84
D10	SYBR	GAPDH	Unkn-16	NC	19.1563			D10	SYBR	GAPDH	Unkn-16	NC	84
E02	SYBR	CD14	Unkn-05	SH-1	30.2828			E02	SYBR	CD14	Unkn-05	SH-1	83
E03	SYBR	CD14	Unkn-05	SH-1	30.3072			E03	SYBR	CD14	Unkn-05	SH-1	83.5
E04	SYBR	CD14	Unkn-05	SH-1	30.4152			E04	SYBR	CD14	Unkn-05	SH-1	83
E05	SYBR	CD11b	Unkn-11	SH-1	28.6272			E05	SYBR	CD11b	Unkn-11	SH-1	83
E06	SYBR	CD11b	Unkn-11	SH-1	28.8581			E06	SYBR	CD11b	Unkn-11	SH-1	83
E07	SYBR	CD11b	Unkn-11	SH-1	28.5994			E07	SYBR	CD11b	Unkn-11	SH-1	83
E08	SYBR	GAPDH	Unkn-17	SH-1	19.0355			E08	SYBR	GAPDH	Unkn-17	SH-1	84
E09	SYBR	GAPDH	Unkn-17	SH-1	19.3089			E09	SYBR	GAPDH	Unkn-17	SH-1	84
E10	SYBR	GAPDH	Unkn-17	SH-1	19.1053			E10	SYBR	GAPDH	Unkn-17	SH-1	84
F02	SYBR	CD14	Unkn-06	SH-2	30.1763			F02	SYBR	CD14	Unkn-06	SH-2	83.5
F03	SYBR	CD14	Unkn-06	SH-2	30.1588			F03	SYBR	CD14	Unkn-06	SH-2	83
F04	SYBR	CD14	Unkn-06	SH-2	30.2102			F04	SYBR	CD14	Unkn-06	SH-2	83
F05	SYBR	CD11b	Unkn-12	SH-2	28.6474			F05	SYBR	CD11b	Unkn-12	SH-2	83
F06	SYBR	CD11b	Unkn-12	SH-2	28.5499			F06	SYBR	CD11b	Unkn-12	SH-2	83
F07	SYBR	CD11b	Unkn-12	SH-2	28.6869			F07	SYBR	CD11b	Unkn-12	SH-2	83
F08	SYBR	GAPDH	Unkn-18	SH-2	19.0797			F08	SYBR	GAPDH	Unkn-18	SH-2	84
F09	SYBR	GAPDH	Unkn-18	SH-2	19.2343			F09	SYBR	GAPDH	Unkn-18	SH-2	84
F10	SYBR	GAPDH	Unkn-18	SH-2	19.1658			F10	SYBR	GAPDH	Unkn-18	SH-2	84
3.Data analysis
Cell line	Target Gene	Group		Data analysis
				GAPDH	Gene	∆Ct	Average ∆Ct	∆∆Ct	2^-△△Ct	STDEV	P Value（VS NC）
KG-1a	CD14	NC		18.6491	26.9512	8.30209	8.45529	0	1	0.134996		10.8282	0	1
				18.6193	27.1263	8.50694
				18.6392	27.196	8.55683
		SH-1		18.9234	29.6552	10.7317	10.8282	2.37296	0.193049	0.197305	#VALUE!	10.3422	-0.486	1.4
				18.7811	29.8364	11.0552
				18.938	29.6358	10.6978
		SH-2		18.6673	29.1663	10.499	10.3422	1.88688	0.270391	0.161112	#VALUE!	8.46	-2.38	5.09
				18.6539	29.0044	10.3505
				18.8245	29.0015	10.1771
	CD11b	NC		18.6491	27.5572	8.9081	8.89739	0	1	0.123693		10.8862	0	1
				18.6193	27.6347	9.01539
				18.6392	27.4079	8.7687
		SH-1		18.9234	29.8097	10.8862	10.8862	1.98881	0.251947	0.0949347	#VALUE!	10.6102	-0.28	1.214
				18.7811	29.7623	10.9811
				18.938	29.7293	10.7913
		SH-2		18.6673	29.3863	10.7191	10.6102	1.71285	0.305057	0.0942287	#VALUE!	8.89739	-1.993	3.98
				18.6539	29.2097	10.5559
				18.8245	29.3803	10.5558
THP-1	CD14	NC		19.2661	27.4717	8.2056	8.34239	0	1	0.16153		11.1851	0	1
				19.3848	27.6857	8.30096
				19.1563	27.6769	8.52059
		SH-1		19.0355	30.2828	11.2472	11.1851	2.84273	0.139396	0.164816	#VALUE!	11.0218	-0.164	1.12
				19.3089	30.3072	10.9983
				19.1053	30.4152	11.3099
		SH-2		19.0797	30.1763	11.0966	11.0218	2.67946	0.1561	0.0882755	#VALUE!	8.34239	-2.843	7.175
				19.2343	30.1588	10.9245
				19.1658	30.2102	11.0444
	CD11b	NC		19.2661	26.6012	7.33505	7.37768	0	1	0.0849989		9.54498	0	1
				19.3848	26.7072	7.32243
				19.1563	26.6319	7.47556
		SH-1		19.0355	28.6272	9.59164	9.54498	2.1673	0.222627	0.0489067	#VALUE!	9.46815	-0.0768	1.055
				19.3089	28.8581	9.5492
				19.1053	28.5994	9.4941
		SH-2		19.0797	28.6474	9.56775	9.46815	2.09047	0.234804	0.134158	#VALUE!	7.37768	-2.167	4.49
				19.2343	28.5499	9.3156
				19.1658	28.6869	9.52109
4.Dissolution curve
GAPDH
CD14
GAPDH

## Sheet: Fig6E_EROR mRNA
1.Amplification curve
GAPDH										BCL-2
2.Data
Well	Fluor	Target	Content	Sample	Cq			Well	Fluor	Target	Content	Sample	Melt Temp
A01	SYBR	GAPDH	Unkn-01	NC	15.0413			A01	SYBR	GAPDH	Unkn-01	NC	86
A02	SYBR	GAPDH	Unkn-01	NC	15.1154			A02	SYBR	GAPDH	Unkn-01	NC	86
A03	SYBR	GAPDH	Unkn-01	NC	15.1803			A03	SYBR	GAPDH	Unkn-01	NC	86
A04	SYBR	BCL-2	Unkn-02	NC	24.1503			A04	SYBR	BCL-2	Unkn-02	NC	86
A05	SYBR	BCL-2	Unkn-02	NC	24.0778			A05	SYBR	BCL-2	Unkn-02	NC	86
A06	SYBR	BCL-2	Unkn-02	NC	24.0974			A06	SYBR	BCL-2	Unkn-02	NC	86
B01	SYBR	GAPDH	Unkn-05	si-1	14.7703			B01	SYBR	GAPDH	Unkn-05	si-1	86
B02	SYBR	GAPDH	Unkn-05	si-1	15.1692			B02	SYBR	GAPDH	Unkn-05	si-1	86
B03	SYBR	GAPDH	Unkn-05	si-1	15.1422			B03	SYBR	GAPDH	Unkn-05	si-1	86
B04	SYBR	BCL-2	Unkn-06	si-1	25.7618			B04	SYBR	BCL-2	Unkn-06	si-1	86
B05	SYBR	BCL-2	Unkn-06	si-1	25.7044			B05	SYBR	BCL-2	Unkn-06	si-1	86
B06	SYBR	BCL-2	Unkn-06	si-1	25.5212			B06	SYBR	BCL-2	Unkn-06	si-1	86
C01	SYBR	GAPDH	Unkn-09	si-2	14.7403			C01	SYBR	GAPDH	Unkn-09	si-2	86
C02	SYBR	GAPDH	Unkn-09	si-2	14.7449			C02	SYBR	GAPDH	Unkn-09	si-2	85.5
C03	SYBR	GAPDH	Unkn-09	si-2	14.9884			C03	SYBR	GAPDH	Unkn-09	si-2	86
C04	SYBR	BCL-2	Unkn-10	si-2	26.0626			C04	SYBR	BCL-2	Unkn-10	si-2	86
C05	SYBR	BCL-2	Unkn-10	si-2	25.6977			C05	SYBR	BCL-2	Unkn-10	si-2	86
C06	SYBR	BCL-2	Unkn-10	si-2	25.7929			C06	SYBR	BCL-2	Unkn-10	si-2	86
3.Data analysis
KG-1a	Data analysis
	BCL-2	GAPDH	∆Ct	AVERAGE	∆∆Ct	2-∆∆Ct	AVERAGE	STDEV.	T-TEST
NC	24.1503	15.0413	9.10908	8.99621	0.112874	0.924744	1.0016	0.0685352
	24.0778	15.1154	8.96246		-0.0337534	1.02367
	24.0974	15.1803	8.91709		-0.0791203	1.05637
si-1	25.7618	14.7703	10.9915	10.6352	1.99528	0.250819	0.32614	0.068138	0.000267114
	25.7044	15.1692	10.5353		1.53907	0.344108
	25.5212	15.1422	10.3789		1.38272	0.383494
si-2	26.0626	14.7403	11.3224	11.0265	2.32618	0.199411	0.247528	0.0439403	8.82757e-05
	25.6977	14.7449	10.9527		1.95654	0.257646
	25.7929	14.9884	10.8045		1.8083	0.285527
4.Dissolution curve
GAPDH										BCL-2

## Sheet: Fig6F_EPOR mRNA
1.Amplification curve
GAPDH										BCL-2
2.Data
Well	Fluor	Target	Content	Sample	Cq			Well	Fluor	Target	Content	Sample	Melt Temp
A01	SYBR	GAPDH	Unkn-01	NC	15.0413			A01	SYBR	GAPDH	Unkn-01	NC	86
A02	SYBR	GAPDH	Unkn-01	NC	15.1154			A02	SYBR	GAPDH	Unkn-01	NC	86
A03	SYBR	GAPDH	Unkn-01	NC	15.1803			A03	SYBR	GAPDH	Unkn-01	NC	86
A04	SYBR	BCL-2	Unkn-02	NC	24.1503			A04	SYBR	BCL-2	Unkn-02	NC	86
A05	SYBR	BCL-2	Unkn-02	NC	24.0778			A05	SYBR	BCL-2	Unkn-02	NC	86
A06	SYBR	BCL-2	Unkn-02	NC	24.0974			A06	SYBR	BCL-2	Unkn-02	NC	86
B01	SYBR	GAPDH	Unkn-05	si-1	14.7703			B01	SYBR	GAPDH	Unkn-05	si-1	86
B02	SYBR	GAPDH	Unkn-05	si-1	15.1692			B02	SYBR	GAPDH	Unkn-05	si-1	86
B03	SYBR	GAPDH	Unkn-05	si-1	15.1422			B03	SYBR	GAPDH	Unkn-05	si-1	86
B04	SYBR	BCL-2	Unkn-06	si-1	25.7618			B04	SYBR	BCL-2	Unkn-06	si-1	86
B05	SYBR	BCL-2	Unkn-06	si-1	25.7044			B05	SYBR	BCL-2	Unkn-06	si-1	86
B06	SYBR	BCL-2	Unkn-06	si-1	25.5212			B06	SYBR	BCL-2	Unkn-06	si-1	86
C01	SYBR	GAPDH	Unkn-09	si-2	14.7403			C01	SYBR	GAPDH	Unkn-09	si-2	86
C02	SYBR	GAPDH	Unkn-09	si-2	14.7449			C02	SYBR	GAPDH	Unkn-09	si-2	85.5
C03	SYBR	GAPDH	Unkn-09	si-2	14.9884			C03	SYBR	GAPDH	Unkn-09	si-2	86
C04	SYBR	BCL-2	Unkn-10	si-2	26.0626			C04	SYBR	BCL-2	Unkn-10	si-2	86
C05	SYBR	BCL-2	Unkn-10	si-2	25.6977			C05	SYBR	BCL-2	Unkn-10	si-2	86
C06	SYBR	BCL-2	Unkn-10	si-2	25.7929			C06	SYBR	BCL-2	Unkn-10	si-2	86
3.Data analysis
KG-1a	Data analysis
	BCL-2	GAPDH	∆Ct	AVERAGE	∆∆Ct	2-∆∆Ct	AVERAGE	STDEV.	T-TEST
NC	24.1503	15.0413	9.10908	8.99621	0.112874	0.924744	1.0016	0.0685352
	24.0778	15.1154	8.96246		-0.0337534	1.02367
	24.0974	15.1803	8.91709		-0.0791203	1.05637
si-1	25.7618	14.7703	10.9915	10.6352	1.99528	0.250819	0.32614	0.068138	0.000267114
	25.7044	15.1692	10.5353		1.53907	0.344108
	25.5212	15.1422	10.3789		1.38272	0.383494
si-2	26.0626	14.7403	11.3224	11.0265	2.32618	0.199411	0.247528	0.0439403	8.82757e-05
	25.6977	14.7449	10.9527		1.95654	0.257646
	25.7929	14.9884	10.8045		1.8083	0.285527
4.Dissolution curve
GAPDH										BCL-2

## Sheet: Fig6H
1.Amplification curve
GAPDH										EPOR
2.Data
Well	Fluor	Target	Content	Sample	Cq			Well	Fluor	Target	Content	Sample	Melt Temp
A01	SYBR	GAPDH	Unkn-01	4h-NC	15.9593			A01	SYBR	GAPDH	Unkn-01	4h-NC	86
A02	SYBR	GAPDH	Unkn-01	4h-NC	15.8875			A02	SYBR	GAPDH	Unkn-01	4h-NC	86
A03	SYBR	GAPDH	Unkn-01	4h-NC	16.0623			A03	SYBR	GAPDH	Unkn-01	4h-NC	86
A04	SYBR	EPOR	Unkn-02	4h-NC	20.528			A04	SYBR	EPOR	Unkn-02	4h-NC	77
A05	SYBR	EPOR	Unkn-02	4h-NC	20.5737			A05	SYBR	EPOR	Unkn-02	4h-NC	77.5
A06	SYBR	EPOR	Unkn-02	4h-NC	20.4669			A06	SYBR	EPOR	Unkn-02	4h-NC	77.5
B01	SYBR	GAPDH	Unkn-05	8hNC	15.7559			B01	SYBR	GAPDH	Unkn-05	8hNC	86
B02	SYBR	GAPDH	Unkn-05	8hNC	16.0331			B02	SYBR	GAPDH	Unkn-05	8hNC	86
B03	SYBR	GAPDH	Unkn-05	8hNC	15.96			B03	SYBR	GAPDH	Unkn-05	8hNC	86
B04	SYBR	EPOR	Unkn-06	8hNC	20.5641			B04	SYBR	EPOR	Unkn-06	8hNC	77
B05	SYBR	EPOR	Unkn-06	8hNC	20.5339			B05	SYBR	EPOR	Unkn-06	8hNC	77
B06	SYBR	EPOR	Unkn-06	8hNC	20.522			B06	SYBR	EPOR	Unkn-06	8hNC	77.5
C01	SYBR	GAPDH	Unkn-09	12h-NC	15.5584			C01	SYBR	GAPDH	Unkn-09	12h-NC	86
C02	SYBR	GAPDH	Unkn-09	12h-NC	15.7713			C02	SYBR	GAPDH	Unkn-09	12h-NC	86
C03	SYBR	GAPDH	Unkn-09	12h-NC	16.1451			C03	SYBR	GAPDH	Unkn-09	12h-NC	86
C04	SYBR	EPOR	Unkn-10	12h-NC	20.3256			C04	SYBR	EPOR	Unkn-10	12h-NC	77
C05	SYBR	EPOR	Unkn-10	12h-NC	20.4787			C05	SYBR	EPOR	Unkn-10	12h-NC	77
C06	SYBR	EPOR	Unkn-10	12h-NC	20.4516			C06	SYBR	EPOR	Unkn-10	12h-NC	77
D01	SYBR	GAPDH	Unkn-13	4h-si-1	15.664			D01	SYBR	GAPDH	Unkn-13	4h-si-1	86
D02	SYBR	GAPDH	Unkn-13	4h-si-1	15.8028			D02	SYBR	GAPDH	Unkn-13	4h-si-1	86
D03	SYBR	GAPDH	Unkn-13	4h-si-1	15.9037			D03	SYBR	GAPDH	Unkn-13	4h-si-1	86
D04	SYBR	EPOR	Unkn-14	4h-si-1	20.7154			D04	SYBR	EPOR	Unkn-14	4h-si-1	77
D05	SYBR	EPOR	Unkn-14	4h-si-1	20.7388			D05	SYBR	EPOR	Unkn-14	4h-si-1	77.5
D06	SYBR	EPOR	Unkn-14	4h-si-1	20.7428			D06	SYBR	EPOR	Unkn-14	4h-si-1	77
E01	SYBR	GAPDH	Unkn-17	8h-si-1	15.6598			E01	SYBR	GAPDH	Unkn-17	8h-si-1	86
E02	SYBR	GAPDH	Unkn-17	8h-si-1	15.5883			E02	SYBR	GAPDH	Unkn-17	8h-si-1	86
E03	SYBR	GAPDH	Unkn-17	8h-si-1	15.9094			E03	SYBR	GAPDH	Unkn-17	8h-si-1	86
E04	SYBR	EPOR	Unkn-18	8h-si-1	21.4602			E04	SYBR	EPOR	Unkn-18	8h-si-1	77.5
E05	SYBR	EPOR	Unkn-18	8h-si-1	21.507			E05	SYBR	EPOR	Unkn-18	8h-si-1	77.5
E06	SYBR	EPOR	Unkn-18	8h-si-1	21.4156			E06	SYBR	EPOR	Unkn-18	8h-si-1	77.5
F01	SYBR	GAPDH	Unkn-21	12h-si-1	16.0326			F01	SYBR	GAPDH	Unkn-21	12h-si-1	86
F02	SYBR	GAPDH	Unkn-21	12h-si-1	15.8625			F02	SYBR	GAPDH	Unkn-21	12h-si-1	86
F03	SYBR	GAPDH	Unkn-21	12h-si-1	16.0605			F03	SYBR	GAPDH	Unkn-21	12h-si-1	86
F04	SYBR	EPOR	Unkn-22	12h-si-1	21.9453			F04	SYBR	EPOR	Unkn-22	12h-si-1	77.5
F05	SYBR	EPOR	Unkn-22	12h-si-1	21.9876			F05	SYBR	EPOR	Unkn-22	12h-si-1	77.5
F06	SYBR	EPOR	Unkn-22	12h-si-1	21.6091			F06	SYBR	EPOR	Unkn-22	12h-si-1	77
G01	SYBR	GAPDH	Unkn-25	4h-si-2	15.423			G01	SYBR	GAPDH	Unkn-25	4h-si-2	86
G02	SYBR	GAPDH	Unkn-25	4h-si-2	15.5258			G02	SYBR	GAPDH	Unkn-25	4h-si-2	86
G03	SYBR	GAPDH	Unkn-25	4h-si-2	15.6481			G03	SYBR	GAPDH	Unkn-25	4h-si-2	86
G04	SYBR	EPOR	Unkn-26	4h-si-2	20.5299			G04	SYBR	EPOR	Unkn-26	4h-si-2	77
G05	SYBR	EPOR	Unkn-26	4h-si-2	20.4809			G05	SYBR	EPOR	Unkn-26	4h-si-2	77
G06	SYBR	EPOR	Unkn-26	4h-si-2	20.4965			G06	SYBR	EPOR	Unkn-26	4h-si-2	77
G07	SYBR	GAPDH	Unkn-27	12h-.si-2	15.7976			G07	SYBR	GAPDH	Unkn-27	12h-.si-2	86
G08	SYBR	GAPDH	Unkn-27	12h-.si-2	15.5765			G08	SYBR	GAPDH	Unkn-27	12h-.si-2	86
G09	SYBR	GAPDH	Unkn-27	12h-.si-2	15.5167			G09	SYBR	GAPDH	Unkn-27	12h-.si-2	86
G10	SYBR	EPOR	Unkn-28	12h-.si-2	21.5777			G10	SYBR	EPOR	Unkn-28	12h-.si-2	77.5
G11	SYBR	EPOR	Unkn-28	12h-.si-2	21.7667			G11	SYBR	EPOR	Unkn-28	12h-.si-2	77.5
G12	SYBR	EPOR	Unkn-28	12h-.si-2	21.5202			G12	SYBR	EPOR	Unkn-28	12h-.si-2	77.5
H01	SYBR	GAPDH	Unkn-29	8-hsi-2	15.6398			H01	SYBR	GAPDH	Unkn-29	8-hsi-2	86
H02	SYBR	GAPDH	Unkn-29	8-hsi-2	15.5973			H02	SYBR	GAPDH	Unkn-29	8-hsi-2	86
H03	SYBR	GAPDH	Unkn-29	8-hsi-2	15.9161			H03	SYBR	GAPDH	Unkn-29	8-hsi-2	86
H04	SYBR	EPOR	Unkn-30	8-hsi-2	21.076			H04	SYBR	EPOR	Unkn-30	8-hsi-2	77.5
H05	SYBR	EPOR	Unkn-30	8-hsi-2	20.8714			H05	SYBR	EPOR	Unkn-30	8-hsi-2	77
H06	SYBR	EPOR	Unkn-30	8-hsi-2	21.0674			H06	SYBR	EPOR	Unkn-30	8-hsi-2	77
3.Data analysis
KG-1a	Data analysis
	EPOR	GAPDH	∆Ct	AVERAGE	∆∆Ct	2-∆∆Ct	STDEV.	cycloleucine	T-TEST
NC	20.528	15.9593	4.5687	4.55319	0	1	1	0
	20.5737	15.8875	4.68626
	20.4669	16.0623	4.40462
NC	20.5641	15.7559	4.80824	4.62369	0.07	0.953	0.953	50mM
	20.5339	16.0331	4.50083
	20.522	15.96	4.562
NC	20.3256	15.5584	4.76715	4.5937	0.043	0.971	0.971	100mM
	20.4787	15.7713	4.70735
	20.4516	16.1451	4.30658
si-1	20.7154	15.664	5.0514	4.9422	0	1	1	0	0.0415694
	20.7388	15.8028	4.93607
	20.7428	15.9037	4.83913
si-1	21.4602	15.6598	5.80038	5.74176	0.8	0.574	0.574	50mM	0.00522917
	21.507	15.5883	5.91873
	21.4156	15.9094	5.50617
si-1	21.9453	16.0326	5.9127	5.86213	0.92	0.528	0.528	100mM	0.000943399
	21.9876	15.8625	6.12506
	21.6091	16.0605	5.54862
si-2	20.5299	15.423	5.10689	4.97012	0	1	1	0	0.141395
	20.4809	15.5258	4.95507
	20.4965	15.6481	4.84841
si-2	21.076	15.6398	5.43621	5.28723	0.32	0.80107	0.80107	50mM	0.0138342
	20.8714	15.5973	5.27417
	21.0674	15.9161	5.1513
si-2	21.5777	15.7976	5.78012	5.99125	I.02	0.493	0.493	100mM	0.000817139
	21.7667	15.5765	6.19015
	21.5202	15.5167	6.00348
4.Dissolution curve
GAPDH										EPOR

## Sheet: Fig6I
1.Amplification curve
GAPDH										EPOR
2.Data
Well	Fluor	Target	Content	Sample	Cq			Well	Fluor	Target	Content	Sample	Melt Temp
A01	SYBR	GAPDH	Unkn-01	4h-NC	16.5768			A01	SYBR	GAPDH	Unkn-01	4h-NC	86
A02	SYBR	GAPDH	Unkn-01	4h-NC	16.9328			A02	SYBR	GAPDH	Unkn-01	4h-NC	86
A03	SYBR	GAPDH	Unkn-01	4h-NC	16.7552			A03	SYBR	GAPDH	Unkn-01	4h-NC	86
A04	SYBR	EPOR	Unkn-02	4h-NC	21.4383			A04	SYBR	EPOR	Unkn-02	4h-NC	77.5
A05	SYBR	EPOR	Unkn-02	4h-NC	21.5285			A05	SYBR	EPOR	Unkn-02	4h-NC	77.5
A06	SYBR	EPOR	Unkn-02	4h-NC	21.457			A06	SYBR	EPOR	Unkn-02	4h-NC	77.5
B01	SYBR	GAPDH	Unkn-05	8h-NC	16.6495			B01	SYBR	GAPDH	Unkn-05	8h-NC	86
B02	SYBR	GAPDH	Unkn-05	8h-NC	16.7023			B02	SYBR	GAPDH	Unkn-05	8h-NC	86
B03	SYBR	GAPDH	Unkn-05	8h-NC	17.0192			B03	SYBR	GAPDH	Unkn-05	8h-NC	86
B04	SYBR	EPOR	Unkn-06	8h-NC	21.4279			B04	SYBR	EPOR	Unkn-06	8h-NC	77.5
B05	SYBR	EPOR	Unkn-06	8h-NC	21.5537			B05	SYBR	EPOR	Unkn-06	8h-NC	77.5
B06	SYBR	EPOR	Unkn-06	8h-NC	21.5515			B06	SYBR	EPOR	Unkn-06	8h-NC	77.5
C01	SYBR	GAPDH	Unkn-09	12h-NC	16.6275			C01	SYBR	GAPDH	Unkn-09	12h-NC	86
C02	SYBR	GAPDH	Unkn-09	12h-NC	16.6348			C02	SYBR	GAPDH	Unkn-09	12h-NC	86
C03	SYBR	GAPDH	Unkn-09	12h-NC	16.8095			C03	SYBR	GAPDH	Unkn-09	12h-NC	86
C04	SYBR	EPOR	Unkn-10	12h-NC	21.5085			C04	SYBR	EPOR	Unkn-10	12h-NC	77
C05	SYBR	EPOR	Unkn-10	12h-NC	21.4051			C05	SYBR	EPOR	Unkn-10	12h-NC	77.5
C06	SYBR	EPOR	Unkn-10	12h-NC	21.4841			C06	SYBR	EPOR	Unkn-10	12h-NC	77.5
D01	SYBR	GAPDH	Unkn-13	4h-si-1	16.7925			D01	SYBR	GAPDH	Unkn-13	4h-si-1	86
D02	SYBR	GAPDH	Unkn-13	4h-si-1	16.6313			D02	SYBR	GAPDH	Unkn-13	4h-si-1	86
D03	SYBR	GAPDH	Unkn-13	4h-si-1	16.7174			D03	SYBR	GAPDH	Unkn-13	4h-si-1	86
D04	SYBR	EPOR	Unkn-14	4h-si-1	21.7696			D04	SYBR	EPOR	Unkn-14	4h-si-1	77.5
D05	SYBR	EPOR	Unkn-14	4h-si-1	21.7027			D05	SYBR	EPOR	Unkn-14	4h-si-1	77.5
D06	SYBR	EPOR	Unkn-14	4h-si-1	21.6411			D06	SYBR	EPOR	Unkn-14	4h-si-1	77.5
E01	SYBR	GAPDH	Unkn-17	8h-si-1	16.4246			E01	SYBR	GAPDH	Unkn-17	8h-si-1	86
E02	SYBR	GAPDH	Unkn-17	8h-si-1	16.6473			E02	SYBR	GAPDH	Unkn-17	8h-si-1	86
E03	SYBR	GAPDH	Unkn-17	8h-si-1	16.5147			E03	SYBR	GAPDH	Unkn-17	8h-si-1	86
E04	SYBR	EPOR	Unkn-18	8h-si-1	21.8316			E04	SYBR	EPOR	Unkn-18	8h-si-1	77.5
E05	SYBR	EPOR	Unkn-18	8h-si-1	22.0474			E05	SYBR	EPOR	Unkn-18	8h-si-1	77.5
E06	SYBR	EPOR	Unkn-18	8h-si-1	22.1174			E06	SYBR	EPOR	Unkn-18	8h-si-1	77.5
F01	SYBR	GAPDH	Unkn-21	12h-si-1	16.5497			F01	SYBR	GAPDH	Unkn-21	12h-si-1	86
F02	SYBR	GAPDH	Unkn-21	12h-si-1	16.6129			F02	SYBR	GAPDH	Unkn-21	12h-si-1	86
F03	SYBR	GAPDH	Unkn-21	12h-si-1	16.6917			F03	SYBR	GAPDH	Unkn-21	12h-si-1	86
F04	SYBR	EPOR	Unkn-22	12h-si-1	22.3385			F04	SYBR	EPOR	Unkn-22	12h-si-1	77.5
F05	SYBR	EPOR	Unkn-22	12h-si-1	22.399			F05	SYBR	EPOR	Unkn-22	12h-si-1	77.5
F06	SYBR	EPOR	Unkn-22	12h-si-1	22.2043			F06	SYBR	EPOR	Unkn-22	12h-si-1	77.5
G01	SYBR	GAPDH	Unkn-25	4h-si-2	16.7799			G01	SYBR	GAPDH	Unkn-25	4h-si-2	86
G02	SYBR	GAPDH	Unkn-25	4h-si-2	16.4973			G02	SYBR	GAPDH	Unkn-25	4h-si-2	86
G03	SYBR	GAPDH	Unkn-25	4h-si-2	16.6926			G03	SYBR	GAPDH	Unkn-25	4h-si-2	86
G04	SYBR	EPOR	Unkn-26	4h-si-2	21.5935			G04	SYBR	EPOR	Unkn-26	4h-si-2	77.5
G05	SYBR	EPOR	Unkn-26	4h-si-2	21.6472			G05	SYBR	EPOR	Unkn-26	4h-si-2	77.5
G06	SYBR	EPOR	Unkn-26	4h-si-2	21.5747			G06	SYBR	EPOR	Unkn-26	4h-si-2	77.5
H01	SYBR	GAPDH	Unkn-29	8h-si-2	16.4493			H01	SYBR	GAPDH	Unkn-29	8h-si-2	86
H02	SYBR	GAPDH	Unkn-29	8h-si-2	16.4971			H02	SYBR	GAPDH	Unkn-29	8h-si-2	86
H03	SYBR	GAPDH	Unkn-29	8h-si-2	16.7031			H03	SYBR	GAPDH	Unkn-29	8h-si-2	86
H04	SYBR	EPOR	Unkn-30	8h-si-2	21.8117			H04	SYBR	EPOR	Unkn-30	8h-si-2	77.5
H05	SYBR	EPOR	Unkn-30	8h-si-2	22.0043			H05	SYBR	EPOR	Unkn-30	8h-si-2	77.5
H06	SYBR	EPOR	Unkn-30	8h-si-2	21.8532			H06	SYBR	EPOR	Unkn-30	8h-si-2	77.5
H07	SYBR	GAPDH	Unkn-31	12h-si-2	16.5268			H07	SYBR	GAPDH	Unkn-31	12h-si-2	86
H08	SYBR	GAPDH	Unkn-31	12h-si-2	16.7625			H08	SYBR	GAPDH	Unkn-31	12h-si-2	86
H09	SYBR	GAPDH	Unkn-31	12h-si-2	16.7744			H09	SYBR	GAPDH	Unkn-31	12h-si-2	86
H10	SYBR	EPOR	Unkn-32	12h-si-2	22.7558			H10	SYBR	EPOR	Unkn-32	12h-si-2	77.5
H11	SYBR	EPOR	Unkn-32	12h-si-2	22.4868			H11	SYBR	EPOR	Unkn-32	12h-si-2	77.5
H12	SYBR	EPOR	Unkn-32	12h-si-2	22.6569			H12	SYBR	EPOR	Unkn-32	12h-si-2	77.5
3.Data analysis
THP-1	Data analysis
	EPOR	GAPDH	∆Ct	AVERAGE	∆∆Ct	2-∆∆Ct	STDEV.	cycloleucine	T-TEST
NC	21.4383	16.5768	4.86154	4.7197	0	1	0.0920478	0
	21.5285	16.9328	4.59577
	21.457	16.7552	4.70178
NC	21.4279	16.6495	4.77834	4.72	0.01	1	0.119157	50mM
	21.5537	16.7023	4.85138
	21.5515	17.0192	4.53228
NC	21.5085	16.6275	4.88093	4.773	0.02	0.986233	0.0687738	100mM
	21.4051	16.6348	4.77032
	21.4841	16.8095	4.67456
si-1	21.7696	16.7925	4.97707	4.99072	0	1	0.0426895	0	0.0415694
	21.7027	16.6313	5.07139
	21.6411	16.7174	4.92369
si-1	21.8316	16.4246	5.40703	5.46993	0.48	0.716978	0.0463769	50mM	0.00522917
	22.0474	16.6473	5.40004
	22.1174	16.5147	5.60273
si-1	22.3385	16.5497	5.78877	5.69584	0.71	0.61132	0.057796	100mM	0.000943399
	22.399	16.6129	5.78613
	22.2043	16.6917	5.51264
si-2	21.5935	16.7799	4.81361	4.94857	0	1	0.102294	0	0.141395
	21.6472	16.4973	5.14998
	21.5747	16.6926	4.88211
si-2	21.8117	16.4493	5.36242	5.33989	0.39	0.76313	0.082152	50mM	0.0138342
	22.0043	16.4971	5.50711
	21.8532	16.7031	5.15016
si-2	22.7558	16.5268	6.22902	5.94529	1	0.5	0.0746264	100mM	0.000817139
	22.4868	16.7625	5.72435
	22.6569	16.7744	5.88251
4.Dissolution curve
GAPDH										EPOR

## Sheet: Fig6J
1.Amplification curve
GAPDH											EPOR
2.Data
Well	Fluor	Target	Content	Sample	Cq				Well	Fluor	Target	Content	Sample	Melt Temp
A01	SYBR	GAPDH	Unkn-01	NC	15.0725				A01	SYBR	GAPDH	Unkn-01	NC	86
A02	SYBR	GAPDH	Unkn-01	NC	15.1065				A02	SYBR	GAPDH	Unkn-01	NC	86
A03	SYBR	GAPDH	Unkn-01	NC	15.1173				A03	SYBR	GAPDH	Unkn-01	NC	86
A04	SYBR	EPOR	Unkn-02	NC	20.0805				A04	SYBR	EPOR	Unkn-02	NC	77
A05	SYBR	EPOR	Unkn-02	NC	20.2144				A05	SYBR	EPOR	Unkn-02	NC	77
A06	SYBR	EPOR	Unkn-02	NC	20.0888				A06	SYBR	EPOR	Unkn-02	NC	77
B01	SYBR	GAPDH	Unkn-05	si-1	14.8443				B01	SYBR	GAPDH	Unkn-05	si-1	86
B02	SYBR	GAPDH	Unkn-05	si-1	15.0174				B02	SYBR	GAPDH	Unkn-05	si-1	86
B03	SYBR	GAPDH	Unkn-05	si-1	15.219				B03	SYBR	GAPDH	Unkn-05	si-1	86
B04	SYBR	EPOR	Unkn-06	si-1	21.6881				B04	SYBR	EPOR	Unkn-06	si-1	77
B05	SYBR	EPOR	Unkn-06	si-1	21.8115				B05	SYBR	EPOR	Unkn-06	si-1	77.5
B06	SYBR	EPOR	Unkn-06	si-1	21.8824				B06	SYBR	EPOR	Unkn-06	si-1	77.5
C01	SYBR	GAPDH	Unkn-09	si-2	14.8029				C01	SYBR	GAPDH	Unkn-09	si-2	86
C02	SYBR	GAPDH	Unkn-09	si-2	14.9086				C02	SYBR	GAPDH	Unkn-09	si-2	86
C03	SYBR	GAPDH	Unkn-09	si-2	15.0805				C03	SYBR	GAPDH	Unkn-09	si-2	86
C04	SYBR	EPOR	Unkn-10	si-2	22.5264				C04	SYBR	EPOR	Unkn-10	si-2	77
C05	SYBR	EPOR	Unkn-10	si-2	22.6298				C05	SYBR	EPOR	Unkn-10	si-2	77.5
C06	SYBR	EPOR	Unkn-10	si-2	22.6242				C06	SYBR	EPOR	Unkn-10	si-2	77.5
3.Data analysis
KG1A	Data analysis
	EPOR	GAPDH	∆Ct	AVERAGE	∆∆Ct	2-∆∆Ct	AVERAGE	STDEV.	T-TEST
NC	20.0805	15.0725	5.00802	5.02915	-0.0211213	1.01475	1.00079	0.0485019
	20.2144	15.1065	5.10795		0.0788	0.946845
	20.0888	15.1173	4.97147		-0.0576786	1.04079
si-1	21.6881	14.8443	6.84374	6.76713	1.81459	0.284285	0.300209	0.0196167	2.048e-05
	21.8115	15.0174	6.79418		1.76503	0.29422
	21.8824	15.219	6.66347		1.63432	0.322122
si-2	22.5264	14.8029	7.72354	7.66282	2.6944	0.154492	0.161412	0.0117697	8.268e-06
	22.6298	14.9086	7.7212		2.69206	0.154743
	22.6242	15.0805	7.5437		2.51456	0.175002
4.Dissolution curve
GAPDH											EPOR

[truncated: 3 more sheets: Fig6K, Fig6L_EPOR mRNA stability, Fig6M_EPOR mRNA stability]
